# Supplementary material
Source: PubMed Central journal article supplement (PMC6698386)
Supplement: NIHMS1507828-supplement-2.pdf [file NIHMS1507828-supplement-2.pdf]

## Reporting Summary

Nature Research wishes to improve the reproducibility of the work that we publish. This form provides structure for consistency and transparency in reporting. For further information on Nature Research policies, see [Authors & Referees](#) and the [Editorial Policy Checklist](#).

### Statistical parameters

When statistical analyses are reported, confirm that the following items are present in the relevant location (e.g. figure legend, table legend, main text, or Methods section).

n/a | Confirmed

- The exact sample size ( $n$ ) for each experimental group/condition, given as a discrete number and unit of measurement
- An indication of whether measurements were taken from distinct samples or whether the same sample was measured repeatedly
- The statistical test(s) used AND whether they are one- or two-sided  
*Only common tests should be described solely by name; describe more complex techniques in the Methods section.*
- A description of all covariates tested
- A description of any assumptions or corrections, such as tests of normality and adjustment for multiple comparisons
- A full description of the statistics including central tendency (e.g. means) or other basic estimates (e.g. regression coefficient) AND variation (e.g. standard deviation) or associated estimates of uncertainty (e.g. confidence intervals)
- For null hypothesis testing, the test statistic (e.g.  $F$ ,  $t$ ,  $r$ ) with confidence intervals, effect sizes, degrees of freedom and  $P$  value noted  
*Give  $P$  values as exact values whenever suitable.*
- For Bayesian analysis, information on the choice of priors and Markov chain Monte Carlo settings
- For hierarchical and complex designs, identification of the appropriate level for tests and full reporting of outcomes
- Estimates of effect sizes (e.g. Cohen's  $d$ , Pearson's  $r$ ), indicating how they were calculated
- Clearly defined error bars  
*State explicitly what error bars represent (e.g. SD, SE, CI)*

*Our web collection on [statistics for biologists](#) may be useful.*

### Software and code

Policy information about [availability of computer code](#)

Data collection

Raw Illumina output was converted to fastq format using Illumina Bcl2fastq v2.18.

Data analysis

All open source packages that were used to process and analyze data in this study are detailed below in the "Software" section of ChIP-seq, and include MACS2 version 2.1.0, bedGraphToBigWig from UCSC, ChIPPeakAnno v3.10.1, pybedtools, Rsubread v1.26.1, BEDtools v2.26.0, ROSE, HTSeq v0.9.1, the DiffBind v2.4.8, MEME ChIP suite, and Genomic Regions Enrichment of Annotations Tool (GREAT). Packages used to analyze RNA-seq data include STAR 2.5.2a, GFOLD version 1.1.4, DESEQ2 v1.16.1, Rsubread v1.26.1, deepTools release 2.4, Gene Set Enrichment Analysis (GSEA), and Metascape. Any scripts or code written by the authors are available upon request from the corresponding author.

For manuscripts utilizing custom algorithms or software that are central to the research but not yet described in published literature, software must be made available to editors/reviewers upon request. We strongly encourage code deposition in a community repository (e.g. GitHub). See the Nature Research [guidelines for submitting code & software](#) for further information.

## Data

Policy information about [availability of data](#)

All manuscripts must include a [data availability statement](#). This statement should provide the following information, where applicable:

- Accession codes, unique identifiers, or web links for publicly available datasets
- A list of figures that have associated raw data
- A description of any restrictions on data availability

The sequencing data sets generated during the current study have been deposited in the Gene Expression Omnibus (GEO) repository under accession number GSE113042 (<https://www.ncbi.nlm.nih.gov/geo/query/acc.cgi?acc=GSE113042>). Other data sets that were previously published and used in this study have been deposited in the Gene Expression Omnibus (GEO) repository under accession numbers GSE90634 and GSE108025 available at (<https://www.ncbi.nlm.nih.gov/geo/query/acc.cgi?acc=GSE90634>) and (<https://www.ncbi.nlm.nih.gov/geo/query/acc.cgi?acc=GSE108025>) respectively.

## Field-specific reporting

Please select the best fit for your research. If you are not sure, read the appropriate sections before making your selection.

Life sciences  Behavioural & social sciences  Ecological, evolutionary & environmental sciences

For a reference copy of the document with all sections, see [nature.com/authors/policies/ReportingSummary-flat.pdf](https://www.nature.com/authors/policies/ReportingSummary-flat.pdf)

## Life sciences study design

All studies must disclose on these points even when the disclosure is negative.

|                 |                                                                                                                                                                                                                                                                                                                  |
|-----------------|------------------------------------------------------------------------------------------------------------------------------------------------------------------------------------------------------------------------------------------------------------------------------------------------------------------|
| Sample size     | N/A. No human or animal subjects necessitating sample size calculations were used in this study.                                                                                                                                                                                                                 |
| Data exclusions | No data were excluded from analysis or reporting.                                                                                                                                                                                                                                                                |
| Replication     | All experiments were performed in at least n=2 biologically independent experiments. For proliferation curve experiments, n=3 independent biological samples were used, enabling statistical calculations. No replicates were excluded from analyses presented, and all attempts at replication were successful. |
| Randomization   | Not applicable as human or animal subjects were not used in this study.                                                                                                                                                                                                                                          |
| Blinding        | Not applicable as human or animal subjects were not used in this study.                                                                                                                                                                                                                                          |

## Reporting for specific materials, systems and methods

### Materials & experimental systems

| n/a                                 | Included in the study                                     |
|-------------------------------------|-----------------------------------------------------------|
| <input checked="" type="checkbox"/> | <input type="checkbox"/> Unique biological materials      |
| <input type="checkbox"/>            | <input checked="" type="checkbox"/> Antibodies            |
| <input type="checkbox"/>            | <input checked="" type="checkbox"/> Eukaryotic cell lines |
| <input checked="" type="checkbox"/> | <input type="checkbox"/> Palaeontology                    |
| <input checked="" type="checkbox"/> | <input type="checkbox"/> Animals and other organisms      |
| <input checked="" type="checkbox"/> | <input type="checkbox"/> Human research participants      |

### Methods

| n/a                                 | Included in the study                           |
|-------------------------------------|-------------------------------------------------|
| <input type="checkbox"/>            | <input checked="" type="checkbox"/> ChIP-seq    |
| <input checked="" type="checkbox"/> | <input type="checkbox"/> Flow cytometry         |
| <input checked="" type="checkbox"/> | <input type="checkbox"/> MRI-based neuroimaging |

## Antibodies

### Antibodies used

Antibody Clone# Company Cat# Application Dilution  
 SMARCA4 D1Q7F Cell Signaling Technology 49360 Western blot 1:1000  
 SMARCA4 G-7 Santa Cruz sc-17796 Western blot 1:1000  
 SMARCC1 H-76 Cell Signaling Technology 11956S Western blot 1:1000  
 SMARCC1 D7F8S Santa Cruz sc-10756 Western blot 1:1000  
 SMARCD1 23 Santa Cruz sc-135843 Western blot 1:1000  
 SMARCB1 A-5 Santa Cruz sc-166165 Western blot 1:1000  
 SMARCC2 D8O9V Cell Signaling Technology 12760S Western blot 1:1000  
 SMARCC2 G-12 Santa Cruz sc-166237 Western blot 1:1000

ARID1A C-7 Santa Cruz sc-373784 Western blot 1:1000  
 SS18 D6I4Z Cell Signaling Technology 21792S Western blot 1:1000  
 SS18 A10 Santa Cruz sc-365170 Western blot 1:500  
 BRD7 15125 Cell Signaling Technology 15125S Western blot 1:1000  
 BRD7 B-8 Santa Cruz sc-376180 Western blot 1:1000  
 ARID2 E-3 Santa Cruz sc-166117 Western blot 1:1000  
 BRD9 N/A abcam ab137245 Western blot 1:2000  
 GLTSCR1 N/A Sigma-Aldrich HPA056211 Western blot 1:1000  
 GLTSCR1 H-10 Santa Cruz sc-515086 Western blot 1:1000  
 GLTSCR1L N/A Novus NBP1-86359 Western blot 1:1000  
 DPF2 EPR9206(B) abcam ab134942 Western blot 1:1000  
 PBRM1 N/A Millipore ABE70 Western blot 1:5000  
 SMARCE1 N/A Bethyl Laboratories A300-810A Western blot 1:1000  
 HA C29F4 Cell Signaling Technology 3724S Western blot 1:2000  
 V5 N/A Thermo Fisher R960-25 Western blot 1:5000  
 TBP mAbcam 51841 abcam ab51841 Western blot 1:5000  
 GAPDH G-9 Santa Cruz sc-365062 Western blot 1:1000

Antibody Clone# Company Cat# Application  
 BRD9 N/A abcam ab137245 Immunoprecipitation  
 GLTSCR1L N/A Novus NBP1-86359 Immunoprecipitation  
 GLTSCR1 H-10 Santa Cruz sc-240516 Immunoprecipitation  
 BRD7 D9K2T Cell Signaling Technology 14910 Immunoprecipitation  
 ARID1A D2A8U Cell Signaling Technology 12354S Immunoprecipitation  
 SMARCA4 EPNCIR111A abcam ab110641 Immunoprecipitation  
 SMARCA4 Cell Signaling Technology 49360 Immunoprecipitation  
 V5 D3H8Q Cell Signaling Technology 13202 Immunoprecipitation  
 Rabbit IgG N/A Santa Cruz sc-2027 Immunoprecipitation  
 Goat IgG N/A Santa Cruz sc-2028 Immunoprecipitation

Cell Line Antibody Clone# Company Cat# Lot# Amount  
 EoL-1 BRD9 N/A abcam ab137245 GR257571-14 3ug  
 EoL-1 BRD9 N/A abcam ab66443 GR144569-1 3ug  
 EoL-1 GLTSCR1 S-16 Santa Cruz SC-240516 A2313 15ul  
 EoL-1 BRD7 D9K2T Cell Signaling Technology 14910 Lot 1 15ul  
 EoL-1 DPF2 EPR9206(B) abcam ab134942 YJ031611CS 3ug  
 EoL-1 SMARCC1 fx 2, 4-11 homemade N/A 3/9/15 3ug  
 EoL-1 SMARCA4 EPNCIR111A abcam ab110641 GR150844-12 5ul  
 EoL-1 CTCF D31H2 Cell Signaling Technology 3418S Lot 3 3ug  
 EoL-1 H3K27Ac N/A abcam ab4729 GR238017-2 3ug  
 EoL-1 H3K4me1 N/A abcam ab8895 GR159018-1 3ug  
 EoL-1 H3K4me3 15-10C-E4 Millipore 05745R 2326998 3ul  
 MOLM-13 BRD9 N/A abcam ab137245 GR257571-14 3ug  
 MOLM-13 GLTSCR1 S-16 Santa Cruz SC-240516 A2313 15ul  
 MOLM-13 BRD7 D9K2T Cell Signaling Technology 14910 Lot 1 15ul  
 MOLM-13 DPF2 EPR9206(B) abcam ab134942 YJ031611CS 3ug  
 MOLM-13 SMARCA4 EPNCIR111A abcam ab110641 GR150844-12 5ul  
 MOLM-13 CTCF D31H2 Cell Signaling Technology 3418S Lot 3 3ug  
 SYO-1 BRD9 N/A abcam ab137245 GR257571-20 3ug  
 SYO-1 CTCF D31H2 Cell Signaling Technology 3418S Lot 3 3ug  
 SYO-1 SS18 D6I4Z Cell Signaling Technology 21792s Lot 1 3ul  
 TTC1240 BRD9 N/A abcam ab137245 GR257571-20 3ug  
 TTC1240 BRD9 N/A abcam ab137245 GR257571-23 3ug  
 TTC1240 SMARCA4 EPNCIR111A abcam ab110641 GR3208604-3 5ul  
 TTC1240 CTCF D31H2 Cell Signaling Technology 3418S Lot 3 3ug  
 Aska BRD9 N/A abcam ab137245 GR257571-20 3ug  
 Jurkat BRD9 N/A abcam ab137245 GR257571-20 3ug

#### Validation

All antibodies used in this study have been thoroughly validated by our laboratory to be specific (using IP-mass-spectrometry in wild-type and KO cell lines, and using immunoblot in wild-type and KO cell lines).

## Eukaryotic cell lines

Policy information about [cell lines](#)

#### Cell line source(s)

Cell Line Source  
 HEK-293T, Gift from Dr. Gerald Crabtree at Stanford  
 EoL-1, Gift from Dr. Jay Bradner at DFCI  
 MOLM-13, Gift from Dr. Jay Bradner at DFCI  
 TTC1240, Gift from Dr. Timothy Triche  
 G401, ATCC  
 ES-X, ATCC  
 IMR-90, ATCC  
 RCL7250, Gift from Drs. Berkeley Gryder and Javed Khan at NCI

NCIH-1437, CCLE, Broad Institute  
 ES-2, Gift from Dr. Charles Roberts at DFCI  
 RD, CCLE  
 HCT116, CCLE  
 Calu-6, CCLE  
 Aska, RIKEN  
 SYO-1, RRID:CVCL\_7146  
 HSSYII, RRID:CVCL\_8719

## Authentication

All cell lines were routinely checked for mycoplasma contamination and confirmed negative. All cell lines were subjected to routine fingerprinting analyses to confirm identity.

## Mycoplasma contamination

All cell lines used in the study tested negative for mycoplasma.

Commonly misidentified lines  
(See [ICLAC](#) register)

No cell lines used in this study were found in the database of commonly misidentified cell lines that is maintained by ICLAC and NCBI Biosample.

## ChIP-seq

## Data deposition

Confirm that both raw and final processed data have been deposited in a public database such as [GEO](#).

Confirm that you have deposited or provided access to graph files (e.g. BED files) for the called peaks.

## Data access links

*May remain private before publication.*

The sequencing data sets generated and/or analyzed during the current study have been deposited in the Gene Expression Omnibus (GEO) repository under accession number GSE113042 (<https://www.ncbi.nlm.nih.gov/geo/query/acc.cgi?acc=GSE113042>).

## Files in database submission

fastq and bigWig files for the following ChIP-Seq samples were deposited in the Gene Expression Omnibus, they can be accessed using the link above:

GSM3094366 EOL1\_Input\_Naive\_ChIP-Seq  
 GSM3094367 EOL1\_SMARCA4\_Naive\_ChIP-Seq  
 GSM3094368 EOL1\_BRD9\_137245\_Naive\_ChIP-Seq  
 GSM3094369 EOL1\_BRD9\_66443\_Naive\_ChIP-Seq  
 GSM3094370 EOL1\_GLTSCR1\_Naive\_ChIP-Seq  
 GSM3094371 EOL1\_SMARCC1\_Naive\_ChIP-Seq  
 GSM3094372 EOL1\_BRD7\_Naive\_ChIP-Seq  
 GSM3094373 EOL1\_DPF2\_Naive\_ChIP-Seq  
 GSM3094374 EOL1\_H3K27Ac\_Naive\_ChIP-Seq  
 GSM3094375 EOL1\_CTCF\_Naive\_ChIP-Seq  
 GSM3094376 MOLM13\_Input\_DMSO\_ChIP-Seq  
 GSM3094377 MOLM13\_SMARCA4\_DMSO\_ChIP-Seq  
 GSM3094378 MOLM13\_BRD9\_DMSO\_ChIP-Seq  
 GSM3094379 MOLM13\_BRD7\_DMSO\_ChIP-Seq  
 GSM3094380 MOLM13\_DPF2\_DMSO\_ChIP-Seq  
 GSM3094381 MOLM13\_GLTSCR1\_DMSO\_ChIP-Seq  
 GSM3094382 MOLM13\_CTCF\_DMSO\_ChIP-Seq  
 GSM3094383 EOL1\_H3K4me1\_Naive\_ChIP-Seq  
 GSM3094384 EOL1\_H3K4me3\_Naive\_ChIP-Seq  
 GSM3094385 SYO1\_Input\_shControl\_ChIP-Seq  
 GSM3094386 SYO1\_SS18\_shControl\_ChIP-Seq  
 GSM3094387 SYO1\_BRD9\_shControl\_ChIP-Seq  
 GSM3094388 SYO1\_CTCF\_shControl\_ChIP-Seq  
 GSM3094389 SYO1\_Input\_shSSX\_ChIP-Seq  
 GSM3094390 SYO1\_SS18\_shSSX\_ChIP-Seq  
 GSM3094391 SYO1\_BRD9\_shSSX\_ChIP-Seq  
 GSM3094394 JURKAT\_Input\_Naive\_ChIP-Seq  
 GSM3094395 JURKAT\_BRD9\_Naive\_ChIP-Seq  
 GSM3094396 JURKAT\_CTCF\_Naive\_ChIP-Seq  
 GSM3094397 TTC1240\_BRD9\_N106\_Empty\_ChIP-Seq  
 GSM3094398 TTC1240\_BRD9\_N106\_SMARCB1\_ChIP-Seq  
 GSM3326008 TTC1240\_BRD9\_dBRD9\_ChIP-Seq  
 GSM3326009 TTC1240\_BRD9\_DMSO\_ChIP-Seq  
 GSM3326010 TTC1240\_CTCF\_Empty\_ChIP-Seq  
 GSM3326011 TTC1240\_Input\_dBRD9\_ChIP-Seq  
 GSM3326012 TTC1240\_Input\_DMSO\_ChIP-Seq  
 GSM3326013 TTC1240\_SMARCA4\_Rep1\_dBRD9\_ChIP-Seq  
 GSM3326014 TTC1240\_SMARCA4\_Rep1\_DMSO\_ChIP-Seq  
 GSM3326015 TTC1240\_SMARCA4\_Rep2\_dBRD9\_ChIP-Seq  
 GSM3326016 TTC1240\_SMARCA4\_Rep2\_DMSO\_ChIP-Seq  
 GSM3326017 Aska\_BRD9\_shScr\_ChIP-Seq

GSM3326018 Aska\_BRD9\_shSSX1\_ChIP-Seq  
 GSM3326021 MOLM13 (AML)\_SMARCA4\_dBRD9\_ChIP-Seq

Genome browser session  
 (e.g. [UCSC](#))

N/A

## Methodology

### Replicates

For profiling subcomplex localization in AML, BRD9 ChIPs were done in biological duplicate with multiple independent antibodies in both MOLM13 and EOL-1. All other BAF subunit ChIPs were performed at least once in the independent cell lines EOL1 and MOLM13, with at least 2 antibodies targeting the each subcomplex. In the TTC1240 dBRD9 and DMSO treatment, SMARCA4 ChIP-Seq was performed in biological replicate and these replicates were used to determine differential localization. TTC1240 +SMARCB1 ChIP BRD9 ChIP was also done in biological replicate, however one sample was removed due to insufficient quality (low number of peaks). For synovial sarcoma experiments, fusion and non-fusion complexes were targeted with at least 3 independent antibodies.

### Sequencing depth

All ChIP-Seq samples were single-end sequenced, the raw and mapped read number for each are below:

| Sample Name                         | Raw Reads | Mapped Reads |
|-------------------------------------|-----------|--------------|
| EOL1_Input_Naive_ChIP-Seq           | 42699075  | 40669502     |
| EOL1_SMARCA4_Naive_ChIP-Seq         | 42341658  | 40326539     |
| EOL1_BRD9_137245_Naive_ChIP-Seq     | 43447352  | 40728707     |
| EOL1_BRD9_66443_Naive_ChIP-Seq      | 42280285  | 40193228     |
| EOL1_GLTSCR1_Naive_ChIP-Seq         | 46796897  | 44237227     |
| EOL1_SMARCC1_Naive_ChIP-Seq         | 47561828  | 45205765     |
| EOL1_BRD7_Naive_ChIP-Seq            | 41626359  | 39680595     |
| EOL1_DPF2_Naive_ChIP-Seq            | 21669829  | 20808853     |
| EOL1_H3K27Ac_Naive_ChIP-Seq         | 74052071  | 66199250     |
| EOL1_CTCF_Naive_ChIP-Seq            | 40528536  | 39213478     |
| MOLM13_Input_DMSO_ChIP-Seq          | 93329733  | 89605195     |
| MOLM13_SMARCA4_DMSO_ChIP-Seq        | 57070615  | 54925351     |
| MOLM13_BRD9_DMSO_ChIP-Seq           | 63412810  | 59467859     |
| MOLM13_BRD7_DMSO_ChIP-Seq           | 49599144  | 47390911     |
| MOLM13_DPF2_DMSO_ChIP-Seq           | 31158535  | 29961930     |
| MOLM13_GLTSCR1_DMSO_ChIP-Seq        | 17825260  | 16942277     |
| MOLM13_CTCF_DMSO_ChIP-Seq           | 49433582  | 48148480     |
| EOL1_H3K4me1_Naive_ChIP-Seq         | 82356833  | 80809430     |
| EOL1_H3K4me3_Naive_ChIP-Seq         | 50558228  | 49324772     |
| SYO1_Input_shControl_ChIP-Seq       | 70319926  | 67773771     |
| SYO1_SS18_shControl_ChIP-Seq        | 52043986  | 50297551     |
| SYO1_BRD9_shControl_ChIP-Seq        | 51564898  | 49073866     |
| SYO1_CTCF_shControl_ChIP-Seq        | 50839866  | 49248273     |
| SYO1_Input_shSSX_ChIP-Seq           | 60286800  | 58197355     |
| SYO1_SS18_shSSX_ChIP-Seq            | 47256134  | 45975755     |
| SYO1_BRD9_shSSX_ChIP-Seq            | 43844159  | 42111274     |
| JURKAT_Input_Naive_ChIP-Seq         | 51476102  | 50131147     |
| JURKAT_BRD9_Naive_ChIP-Seq          | 24082851  | 22286692     |
| JURKAT_CTCF_Naive_ChIP-Seq          | 45704160  | 44472440     |
| TTC1240_BRD9_N106_Empty_ChIP-Seq    | 40508291  | 39040020     |
| TTC1240_BRD9_N106_SMARCB1_ChIP-Seq  | 37321904  | 35886274     |
| TTC1240_CTCF_Empty_ChIP-Seq         | 30451167  | 29859369     |
| TTC1240_Input_DMSO_ChIP-Seq         | 28267013  | 27586551     |
| TTC1240_BRD9_DMSO_ChIP-Seq          | 35453747  | 31754443     |
| TTC1240_SMARCA4_Rep1_DMSO_ChIP-Seq  | 32074909  | 26965363     |
| TTC1240_SMARCA4_Rep2_DMSO_ChIP-Seq  | 26794147  | 21150749     |
| TTC1240_Input_dBRD9_ChIP-Seq        | 30672294  | 29974187     |
| TTC1240_BRD9_dBRD9_ChIP-Seq         | 33762508  | 28773196     |
| TTC1240_SMARCA4_Rep1_dBRD9_ChIP-Seq | 28977197  | 22765324     |
| TTC1240_SMARCA4_Rep2_dBRD9_ChIP-Seq | 31275737  | 25903044     |
| Aska_BRD9_shScr_ChIP-Seq            | 45980542  | 43309210     |
| Aska_BRD9_shSSX1_ChIP-Seq           | 46476740  | 44060369     |
| MOLM13_SMARCA4_dBRD9_ChIP-Seq       | 27453257  | 26423192     |

### Antibodies

| Sample Name                     | Antibody | Catalog Number |
|---------------------------------|----------|----------------|
| EOL1_SMARCA4_Naive_ChIP-Seq     | Abcam    | EPNCIR111A     |
| EOL1_BRD9_137245_Naive_ChIP-Seq | Abcam    | 137245         |
| EOL1_BRD9_66443_Naive_ChIP-Seq  | Abcam    | 66443          |
| EOL1_BRD7_Naive_ChIP-Seq        | CST      | 14910          |
| EOL1_DPF2_Naive_ChIP-Seq        | Abcam    | ab134942       |
| EOL1_H3K27Ac_Naive_ChIP-Seq     | Abcam    | ab4729         |
| EOL1_CTCF_Naive_ChIP-Seq        | CST      | 3418S          |
| MOLM13_SMARCA4_DMSO_ChIP-Seq    | Abcam    | EPNCIR111A     |
| MOLM13_BRD9_DMSO_ChIP-Seq       | Abcam    | ab137245       |
| MOLM13_BRD7_DMSO_ChIP-Seq       | CST      | 14910          |
| MOLM13_DPF2_DMSO_ChIP-Seq       | Abcam    | ab134942       |
| MOLM13_CTCF_DMSO_ChIP-Seq       | CST      | 3418           |

EOL1\_H3K4me1\_Naive\_ChIP-Seq: Abcam ab8895  
 EOL1\_H3K4me3\_Naive\_ChIP-Seq: Millipore 05745R  
 SYO1\_SS18\_shControl\_ChIP-Seq: CST 21792s  
 SYO1\_BRD9\_shControl\_ChIP-Seq: Abcam ab137245  
 SYO1\_CTCF\_shControl\_ChIP-Seq: CST 3418S  
 SYO1\_SS18\_shSSX\_ChIP-Seq: CST 21792s  
 SYO1\_BRD9\_shSSX\_ChIP-Seq: Abcam ab137245  
 JURKAT\_BRD9\_Naive\_ChIP-Seq: Abcam 137245  
 JURKAT\_CTCF\_Naive\_ChIP-Seq: CST 3418  
 TTC1240\_BRD9\_N106\_Empty\_ChIP-Seq: Abcam 137245  
 TTC1240\_BRD9\_N106\_SMARCB1\_ChIP-Seq: Abcam 137245  
 TTC1240\_BRD9\_dBRD9\_ChIP-Seq: Abcam 137245  
 TTC1240\_BRD9\_DMSO\_ChIP-Seq: Abcam 137245  
 TTC1240\_CTCF\_Empty\_ChIP-Seq: CST 3418S  
 TTC1240\_SMARCA4\_Rep1\_dBRD9\_ChIP-Seq: Abcam EPNCIR111A  
 TTC1240\_SMARCA4\_Rep1\_DMSO\_ChIP-Seq: Abcam EPNCIR111A  
 TTC1240\_SMARCA4\_Rep2\_dBRD9\_ChIP-Seq: Abcam EPNCIR111A  
 TTC1240\_SMARCA4\_Rep2\_DMSO\_ChIP-Seq: Abcam EPNCIR111A  
 Aska\_BRD9\_shScr\_ChIP-Seq: Abcam 137245  
 Aska\_BRD9\_shSSX1\_ChIP-Seq: Abcam 137245  
 MOLM13\_SMARCA4\_dBRD9\_ChIP-Seq: Abcam EPNCIR111A

#### Peak calling parameters

In EOL1, TTC1240, MOLM13 and Jurkat, narrow peaks were called for all BAF subunits and CTCF against an input using MACS2 'callpeak' with a -q value cutoff of 1e-3 and the --nomodel option. Broad peaks were called for all histone marks using MACS2 'callpeak' with a -q value of 1e-3, and the options --broad\_cutoff --broad --nomodel --SPMR. In the synovial sarcoma cell lines SYO1 and Aska, histone marks and BAF subunits peaks were called using the broadPeak options above, while CTCF peaks were again called using the narrowPeak options.

#### Data quality

For all samples, peaks were called using a qvalue cutoff of 1e-3 against an input. Excepting particular disease or experimental conditions (such as BRD9 peaks after BRD9 degradation with dBRD9) all samples had >6000 peaks, most far higher (20,000+), a full list of peak numbers for each sample is available in Supp.Table 6. Read coverage in peaks was calculated to ensure quality as well. For the TTC1240 DMSO and dBRD9 treatment, a spike-in control was done to normalize read levels between samples.

#### Software

ChIP-Seq Data was aligned using Bowtie2, version 2.1.0 to the hg19 reference genome with the parameter k -1. MACS2 version 2.1.0 was used to call peaks against input with a cutoff of q = .001. Duplicates were removed from reads files using samtools rmdup with the -b option. (SAMtools v1.3.1)

Overlaps for ChIP venn diagrams were created using the bioconductor package ChIPPeakAnno v3.10.1, peak files were read in using the toGRanges() command, values were determined using the getVennCounts() function with maxgap=0. Data was visualized using matplotlib. Read count across peak sets of interest were calculated by calling the Rsubread v1.26.1 bioconductor package function featur0.9eCounts() on duplicate removed bam files. Metagene plots and heatmaps were generated created using HTSeq v0.9.1. Peak distance from TSS elements was determined using bedtools closest function with the hg19 ref Flat TSS annotation. Intersection of peaks was determined using bedtools intersect. (bedtools v2.26.0) Determination of super enhancers was performed using ROSE. Differential occupancy of SMARCA4 in TTC1240 upon dBRD9 treatment was determined using the DiffBind v2.4.8 bioconductor package, with all default settings. Motif analysis on these sequences was done using the MEME-ChIP suite.
